# Supplementary material
Source: PubMed Central journal article supplement (PMC6597492)

**Supplementary Video 1 | HpBD connecting to a preexisting hBD.** 3D projection and surface rendering of a confocal z-stack from a hepatocyte-fate-traced P120 *Alb-Cre*<sup>+/-</sup>; *Rbpj*<sup>ff</sup>; *Hnf6*<sup>ff</sup>; *R26ZG*<sup>+/+</sup> mouse liver (n=2) showing hepatocyte fate tracing (GFP, green) and labeling of both peripheral and hilar cholangiocytes (wsCK, red) and specifically hilar cholangiocytes (DBA, blue).

**Supplementary Video 2 | Clones of hepatocyte-derived peripheral cholangiocytes.** 3D projection of a confocal z-stack from a P150 *Alb-Cre*<sup>+/-</sup>; *Rbpj*<sup>ff</sup>; *Hnf6*<sup>ff</sup>; *R26R-Confetti*<sup>+/-</sup> mouse liver (n=4) showing clonally labeled (yellow, cyan and red) peripheral cholangiocytes (wsCK, purple) and hepatocytes.

**Supplementary Table 1 | RNA-seq analysis.** Excel file showing differentially expressed genes, including analysis of pathway and biological process enrichment, between normal peripheral cholangiocytes (pC, n=3 mice), hepatocytes (H, n=3 mice) and hepatocyte-derived peripheral cholangiocytes (HpC, n=4 mice) as defined by fold-change > 3 for at least 1 of the 3 pairwise comparisons and FDR-corrected  $P < 0.05$  (1-way ANOVA).

**Supplementary Table 2 | Primary antibodies**

**Supplementary Table 3 | Secondary antibodies**

**Supplementary Table 4 | qPCR primers**

**Supplementary Figure 1 | Western blot source data**

**Supplementary Figure 2 | Hepatocyte sorting scheme**

**Supplementary Table 2 | Primary antibodies**

| Antigen      | Dilution                     | Host    | Supplier                 | Catalog #     | Clone/Lot #                    |
|--------------|------------------------------|---------|--------------------------|---------------|--------------------------------|
| ACTIN        | 1:500                        | Mouse   | Seven Hill Bioreagents   | LMAB-C4       | Clone C4                       |
| acTUB        | 1:100                        | Mouse   | Abcam                    | ab24610       | Clone 6-11B-1                  |
| CD11b-PE-Cy7 | 1:100                        | Rat     | Tonbo Bio                | 60-0112       | C0112012616602, C0112012616603 |
| CD31-PE-Cy7  | 1:100                        | Rat     | BioLegend                | 102417        | B212261, B212262               |
| CD45-PE-Cy7  | 1:100                        | Rat     | Tonbo Bio                | 60-0451       | C0451080615602, C0451080615603 |
| CK7          | 1:25                         | Rabbit  | Ventana                  | 790-4462      | Clone SP52                     |
| CK19         | 1:100                        | Rabbit  | Abdomax                  | 602-670       | 1101-766                       |
| CK19         | 1:50                         | Rat     | DSHB                     | Troma-III-s   | 8G4, 48                        |
| DBA-biotin   | 1:100-300                    |         | Vector Labs              | B-1035        | ZA0417                         |
| DBA-FITC     | 1:80                         |         | Vector Labs              | FL-1031-2     | ZA0722                         |
| DESMIN       | 1:100                        | Rabbit  | Thermo Fisher Scientific | RB9014P0      | 9014P1604F, 9014P1604G         |
| EPCAM        | 1:100-500                    | Rat     | BD Biosciences           | 552370        | 7089730                        |
| EPCAM-BV421  | 1:100                        | Rat     | BioLegend                | 118225        | B204922                        |
| F4/80        | 1:100                        | Rat     | BioRad                   | MCA497GA      | Clone A3-1, Batch 1014, 1610   |
| GFP          | 1:200-500                    | Chicken | Abcam                    | ab13970       | GR236651-10, GR236651-21       |
| GFP          | 1:500                        | Rabbit  | Abcam                    | ab6556        | GR277888-1                     |
| HNF1         | 1:50                         | Rabbit  | Santa Cruz               | SC-8986       | G3112                          |
| KI67         | 1:200                        | Rabbit  | Thermo Fisher Scientific | RM-9106-S0    | Clone SP6, Lot 9106S1607G      |
| LYVE1        | 1:200                        | Rabbit  | ReliaTech                | 103-PA50AG    | 1208R1, 1210R03                |
| MUP          | 1:250                        | Goat    | Cedarlane                | GAM/MUP       | 5023                           |
| OC2-2F8      | 1:20                         | Rat     | Craig Dorrell            | <sup>55</sup> | <sup>55</sup>                  |
| OPN          | 1:250                        | Goat    | R&D Systems              | AF808         | BDO0613101, BDO0617041         |
| pSMAD3       | 1:400-500 (IF), 1:1,000 (WB) | Rabbit  | Abcam                    | ab52903       | GR128879-61                    |
| pSMAD3       | 1:400                        | Rabbit  | Cell Signaling           | 9520          | Clone C25A9                    |
| SOX9         | 1:500                        | Rabbit  | MilliporeSigma           | AB5535        | 2847051, 2975230               |
| SSTR2        | 1:500                        | Rabbit  | Bioss                    | bs-1138R      | 9A25V1                         |
| wsCK         | 1:200                        | Rabbit  | Dako                     | Z0622         | 10088577                       |

<sup>55</sup> Huch, M. *et al.* In vitro expansion of single Lgr5<sup>+</sup> liver stem cells induced by Wnt-driven regeneration. *Nature* **494**, 247-250 (2013).

**Supplementary Table 3 | Secondary antibodies**

| Reactivity   | Species | Fluorochrome    | Dilution  | Supplier                 | Catalog #   | Lot #                  |
|--------------|---------|-----------------|-----------|--------------------------|-------------|------------------------|
| Chicken      | Donkey  | Alexa Fluor 488 | 1:500     | Jackson Immuno           | 703-545-155 | 116967, 113085         |
| Goat         | Donkey  | Alexa Fluor 488 | 1:500     | Thermo Fisher Scientific | A11055      | 1869589                |
| Goat         | Donkey  | Alexa Fluor 594 | 1:500     | Jackson Immuno           | 705-585-147 | 106994                 |
| Goat         | Donkey  | Alexa Fluor 594 | 1:500     | Thermo Fisher Scientific | A11058      | 1445994                |
| Goat         | Donkey  | Alexa Fluor 647 | 1:200     | Thermo Fisher Scientific | A21447      | 1841382, 1661244       |
| Goat         | Donkey  | Biotin          | 1:1,000   | Jackson Immuno           | 705-065-003 | 77098                  |
| Goat         | Donkey  | Cy3             | 1:500     | Jackson Immuno           | 705-165-147 | 114067                 |
| Mouse        | Horse   | HRP             | 1:1,000   | Cell Signaling           | 7076        | 27                     |
| Rabbit       | Goat    | Alexa Fluor 488 | 1:300     | Jackson Immuno           | 111-545-144 | 105878                 |
| Rabbit       | Donkey  | Alexa Fluor 555 | 1:200-500 | Thermo Fisher Scientific | A31572      | 1917920                |
| Rabbit       | Donkey  | Alexa Fluor 647 | 1:200     | Jackson Immuno           | 711-605-152 | 118217                 |
| Rabbit       | Donkey  | Biotin          | 1:1,000   | Jackson Immuno           | 711-065-152 | 128874                 |
| Rabbit       | Donkey  | Cy3             | 1:500     | Jackson Immuno           | 711-165-152 | 117211, 105494         |
| Rabbit       | Goat    | HRP             | 1:1,000   | Cell Signaling           | 7074        | 26                     |
| Rabbit       | Goat    | HRP             | 1:500     | Jackson Immuno           | 111-035-144 | 91036                  |
| Rat          | Donkey  | Alexa Fluor 488 | 1:500     | Thermo Fisher Scientific | A21208      | 1789917                |
| Rat          | Donkey  | Alexa Fluor 647 | 1:200     | Jackson Immuno           | 712-605-153 | 123845, 110001, 127806 |
| Rat          | Donkey  | Cy2             | 1:300     | Jackson Immuno           | 712-225-150 | 102982                 |
| Rat          | Goat    | PE              | 1:200     | BD Biosciences           | 550767      | 5107876                |
| Streptavidin |         | Alexa Fluor 594 | 1:300     | Thermo Fisher Scientific | S-11227     | 1704463                |
| Streptavidin |         | Cy2             | 1:250     | Jackson Immuno           | 016-220-084 | 84799                  |
| Streptavidin |         | Cy3             | 1:300     | Jackson Immuno           | 016-160-084 | 125000                 |
| Streptavidin |         | Dylight 649     | 1:300     | Vector Labs              | SA-5649     | Y0718,                 |

|                                |     |       |              |                  |         |       |
|--------------------------------|-----|-------|--------------|------------------|---------|-------|
|                                |     |       |              |                  |         | Z0320 |
| TSA Biotin Kit<br>Streptavidin | HRP | 1:100 | Perkin Elmer | NEL700<br>A001KT | 2075089 |       |
| Tyramide Plus                  | Cy3 | 1:300 | Perkin Elmer | NEL7440<br>01KT  | 2310803 |       |
| Vectastain Elite ABC Reagent   |     |       | Vector Labs  | PK-7100          | ZD0404  |       |

**Supplementary Table 4 | qPCR primers**

| Target                  | Forward primer (5'-3') | Reverse primer (5'-3')   |
|-------------------------|------------------------|--------------------------|
| <i>Alb</i>              | gcagatgacagggcggaacttg | aaaatcagcagcaatggcagge   |
| <i>Epcam</i>            | gcggctcagagagactgt     | ccaagcatttagaccagttt     |
| <i>Fah</i>              | accataggagactacacggact | accacaatggaggaagctcg     |
| <i>Gapdh</i>            | catggccttccgtgttct     | gcggcacgtcagatcca        |
| <i>Hnf4a</i>            | catcaacgaccggcagtac    | gcagcaggtgtcaatcttg      |
| <i>Krt19</i>            | agagacggaggcccgttat    | ctggttctggcgctctatgtc    |
| <i>Rbpj</i> (floxed)    | gagatagacctggttgttg    | ccactgttgtaactggcgt      |
| <i>Rbpj</i> (reference) | gccactccatgtccaaaaga   | gcaagttatagctcagaacagcaa |
| <i>Sox9</i>             | agaccagtaccgcactctgcac | tcttctcgcctctcgttcagca   |
| <i>Spp</i>              | actgccaatctcatggctgt   | actgccaatctcatggctgt     |
| <i>Tr</i>               | tggacaccaatcgtactgg    | aattctgggggttctgac       |

Supplementary Figure 1 | Western blot source data

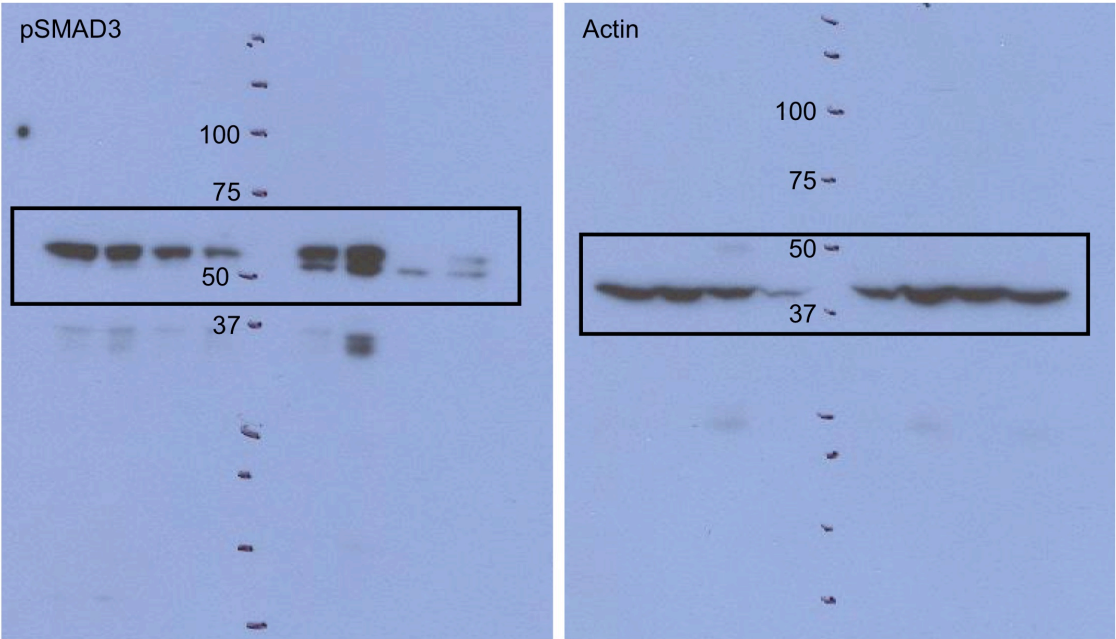

Supplementary Figure 2 | Hepatocyte sorting scheme

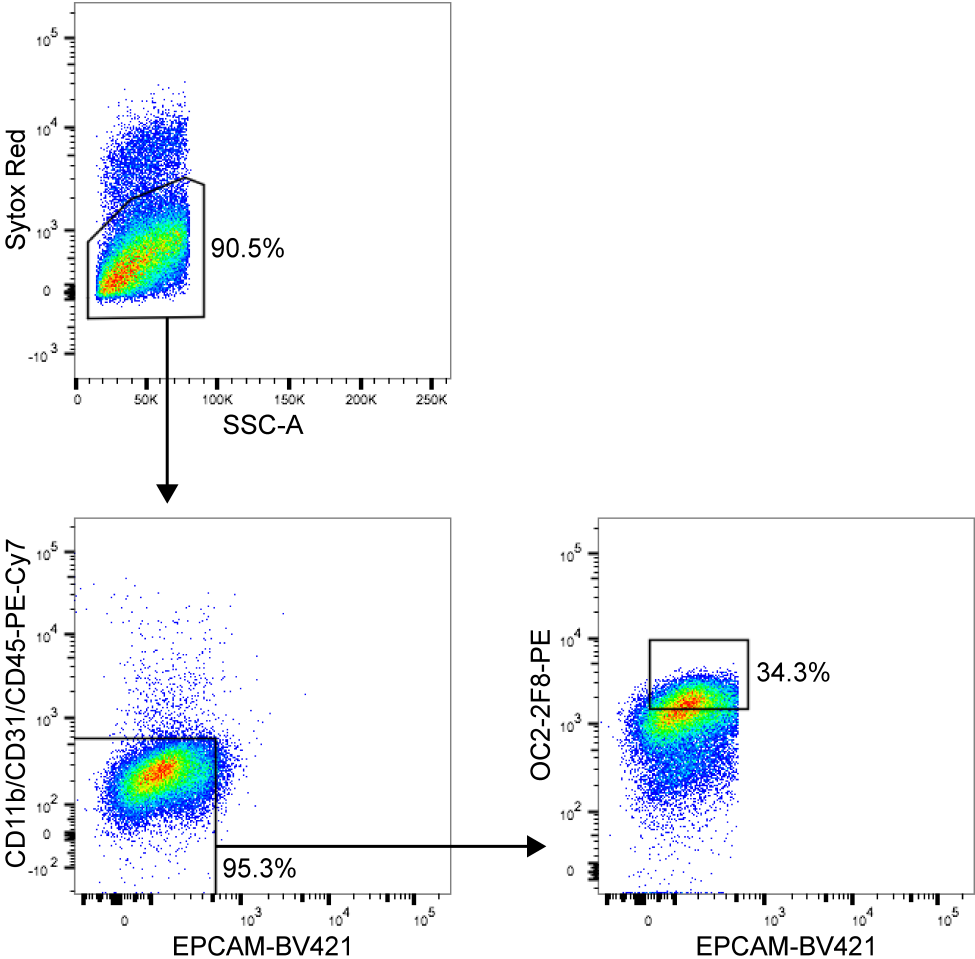

Supplement: NIHMS953987-supplement-Supplementary_Information.pdf [file NIHMS953987-supplement-Supplementary_Information.pdf]
